# Supplementary material
Source: HighWire-hosted journal article supplement (https://jnm.snmjournals.org/highwire/filestream/95253/field_highwire_adjunct_files/0/200030_Supplemental_Data.pdf)
Supplement: 200030_Supplemental_Data.pdf [file 200030_Supplemental_Data.pdf]

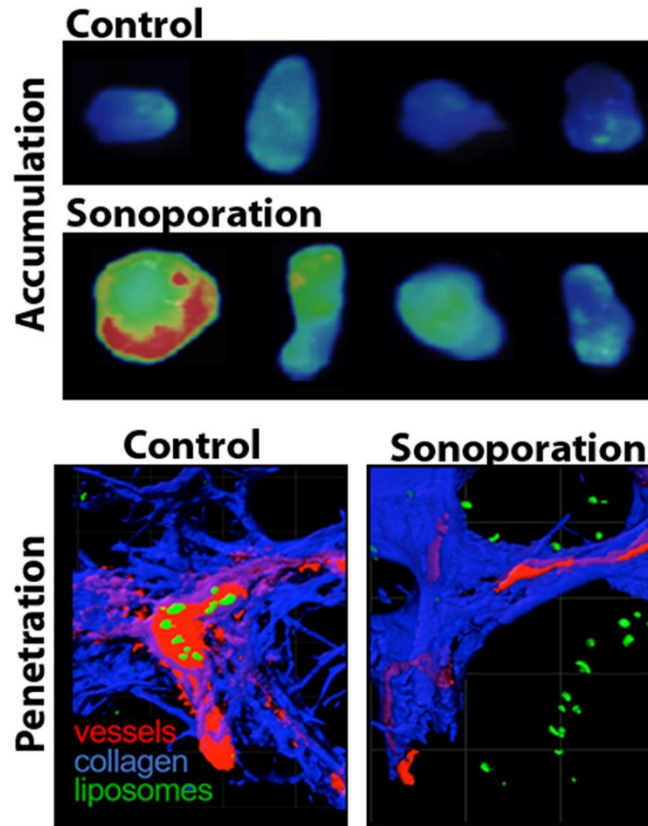

**Supplemental Figure 1:** Accumulation and penetration of fluorophore-labeled liposomes in subcutaneous pancreatic cancer xenografts in mice with and without sonoporation (reproduced with permission from (36)).
